# Supplementary material for: Human cytomegalovirus reactivation from latency: validation of a “switch” model in vitro
Source: PubMed Central journal article supplement (PMC5075216; doi:10.1186/s12985-016-0634-z), 2016-10-22

**a**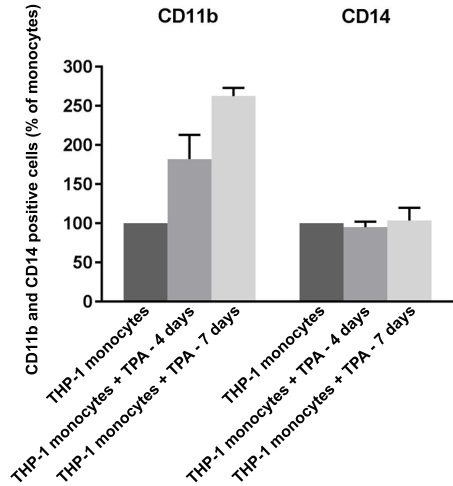**b**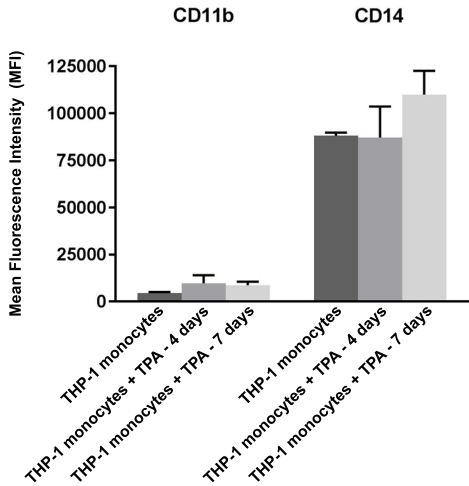

Supplement: 12985_2016_634_MOESM1_ESM.pdf [file 12985_2016_634_MOESM1_ESM.pdf]
