# Supplementary material for: Human cytomegalovirus reactivation from latency: validation of a “switch” model in vitro
Source: PubMed Central journal article supplement (PMC5075216; doi:10.1186/s12985-016-0634-z), 2016-10-22

**A** IE-POSITIVE THP-1 macrophages  
(from THP-1 reactivation model)

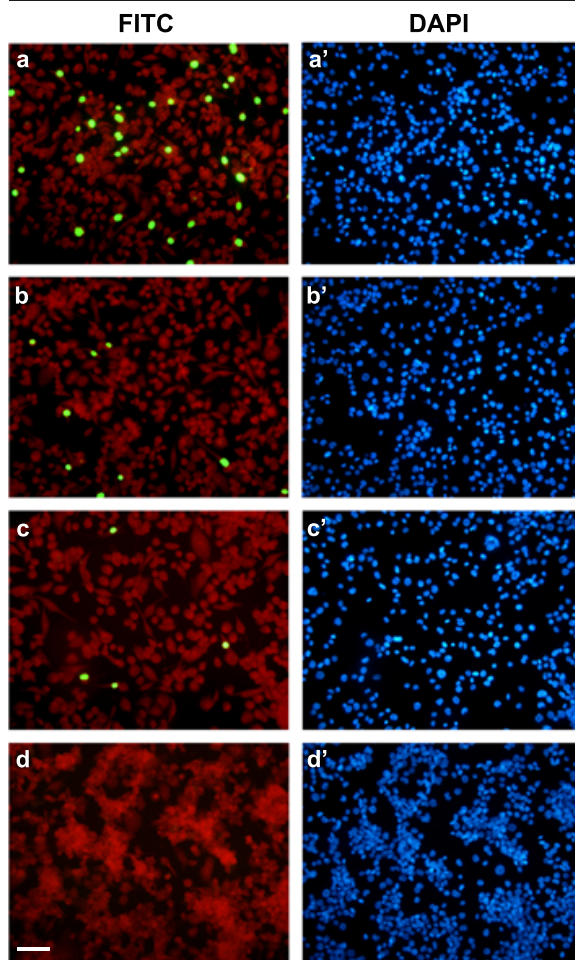

**B** pp65-POSITIVE THP-1 macrophages  
(from THP-1 reactivation model)

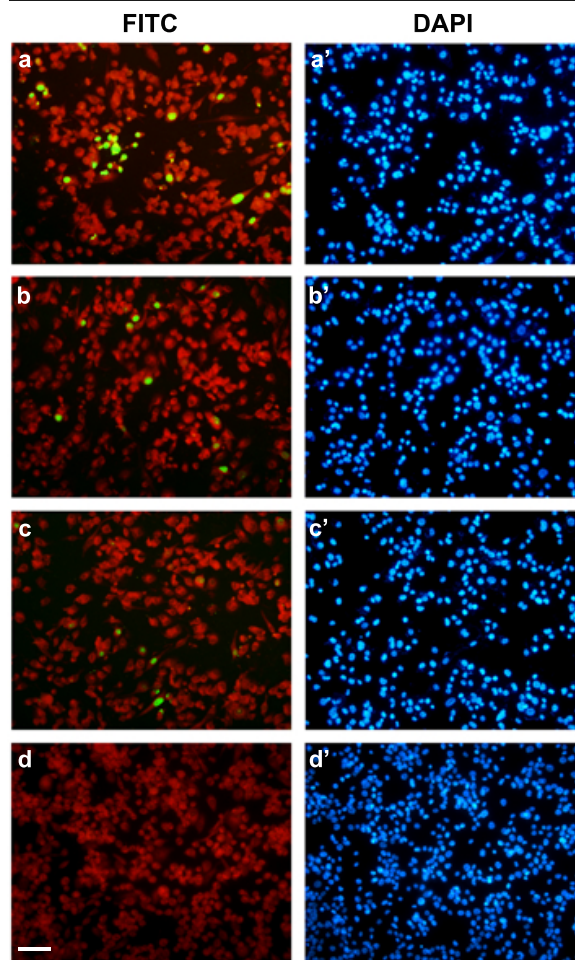

Supplement: 12985_2016_634_MOESM2_ESM.pdf [file 12985_2016_634_MOESM2_ESM.pdf]
